# Supplementary material for: Association Between Age and Complications After Outpatient Colonoscopy
Source: PubMed Central journal article supplement (PMC7317606; doi:10.1001/jamanetworkopen.2020.8958), 2020-06-25
Supplement: jamanetwopen-3-e208958-s001.pdf [file jamanetwopen-3-e208958-s001.pdf]

## Supplementary Online Content

Causada-Calo N, Bishay K, Albashir S, Al Mazroui A, Armstrong D. Association between age and complications after outpatient colonoscopy. *JAMA Netw Open*. 2020;3(6):e208958. doi:10.1001/jamanetworkopen.2020.8958

**eAppendix.** Supplementary Methods

**eFigure.** Probability of 30-Day Complications

**eTable 1.** Databases and Coding

**eTable 2.** Detailed Description of Cardiovascular-Related Admissions

**eTable 3.** Matched Analysis According to Number of Comorbidities and Frequencies of Comorbidities for Older and Younger Patients

**eTable 4.** Rates of Surgically Treated Colorectal Cancer According to Type of Colonoscopy

This supplementary material has been provided by the authors to give readers additional information about their work.

## **eAppendix. Supplementary Methods**

The association between older age (>75 years old) and complications after colonoscopy could be confounded by baseline comorbidity. In order to deal with this limitation, we performed a multivariable logistic regression model including individual comorbidities (main analysis and results). In order to assess the potential confounding effect of comorbidity we performed a secondary analysis by matching exposed and non-exposed patients (i.e.: >75 versus < 75) on baseline comorbidity. Initially, we created a numerical variable indicating the number of comorbidities. Second, we matched every patient older than 75 years old with a patient younger than 75 years old with the same number of comorbidities. For example, for every patient above the age of 75 with 0 comorbidities, we selected a patient <75 with 0 comorbidity. For every patient >75 with one comorbidity, we selected a <75 with one comorbidity, and so forth. Once our matched cohort was created, we assessed the association of age and colonoscopy complications using generalized estimating equations (to account for clustering within each match pair). Out of the 7626 patients older than 75 years of age, 7569 (99.2%) could be matched with a pair younger than 75 years old. **eTable 4** shows the frequency of comorbidities in older and younger than 75 years. As depicted from this table, within each strata of comorbidity, the number of exposed and non-exposed was equal.

**eFigure. Probability of 30-Day Complications(\*)**

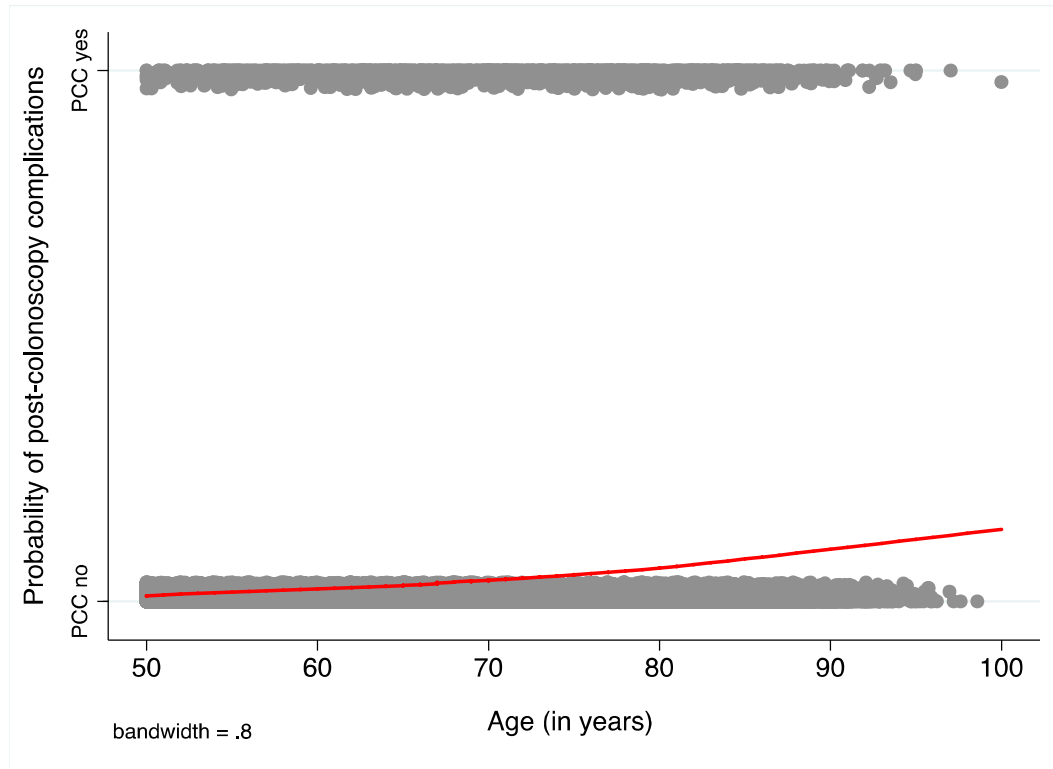

(\*) Lowess function (local weighted regression to fit a smooth curve through points in a scatter plot) to explore the relationship between age as a continuous variable, and the predicted probability of post-colonoscopy complications at 30 days.

**eTable 1. Databases and Coding**

| <b>Term</b>                             | <b>Database(s)</b>                   | <b>Codes</b>                                                                                                                                                                                                                                                                                                                                                                                                                           |
|-----------------------------------------|--------------------------------------|----------------------------------------------------------------------------------------------------------------------------------------------------------------------------------------------------------------------------------------------------------------------------------------------------------------------------------------------------------------------------------------------------------------------------------------|
| Colonoscopy <sup>24</sup>               | OHIP; CIHI-DAD and same day surgery  | <b>OHIP:</b> Z codes (Z555A, Z491A-Z499A), <b>except</b> Z555A+/-E740A alone and Z496A+/-E740A alone<br><b>CIHI DAD/SDS:</b> 2NK70, 2NK71, 2NM70, 2NM71, 2NQ70, 2NQ71, 1NK87, 1NM59, 1NM87, 1NQ59, 1NQ87, 1NQ89                                                                                                                                                                                                                        |
| Surgically -treated colorectal cancer   | Ontario Cancer Registry and CIHI-DAD | C18.x (NOT C18.1), C19, C20 <b>AND</b> Large bowel excision.                                                                                                                                                                                                                                                                                                                                                                           |
| Post-colonoscopy bowel perforation      | CIHI                                 | Admission following colonoscopy that included the following:<br><b>T812 NOT K631</b>                                                                                                                                                                                                                                                                                                                                                   |
| Post-colonoscopy bleeding <sup>31</sup> | CIHI                                 | Admission following colonoscopy with any of the following diagnoses: T810, K625, D62, K921, K922, R58 <b>AND</b> with any of the following conditions:<br><ul style="list-style-type: none"> <li>- Patients with no alternative procedures that could represent the cause of bleeding.</li> <li>- Patients with procedures performed during the hospitalization that would likely be done to treat bleeding (e.g. surgery).</li> </ul> |
| Chronic kidney disease                  | CIHI                                 | N18                                                                                                                                                                                                                                                                                                                                                                                                                                    |
| Heart failure                           | CIHI                                 | I 50 (I 50.0; I 50.1; I 50.9)                                                                                                                                                                                                                                                                                                                                                                                                          |
| Hypertension                            | CIHI                                 | I10; I15                                                                                                                                                                                                                                                                                                                                                                                                                               |
| Atrial fibrillation and flutter         | CIHI                                 | I48x                                                                                                                                                                                                                                                                                                                                                                                                                                   |
| Other cardiac arrhythmias               | CIHI                                 | I44; I45; I47; I49                                                                                                                                                                                                                                                                                                                                                                                                                     |
| Coronary heart disease                  | CIHI                                 | I20x; I25x                                                                                                                                                                                                                                                                                                                                                                                                                             |

|                                                                |      |                                                                 |
|----------------------------------------------------------------|------|-----------------------------------------------------------------|
| Anemia                                                         | CIHI | D50; D51; D52; D53                                              |
| Smoking                                                        | CIHI | Z72.0; F17.2, Z87.891                                           |
| COPD                                                           | CIHI | J44x                                                            |
| Obesity                                                        | CIHI | E66x                                                            |
| Liver disease                                                  | CIHI | K70x, K74.6, K76.0, K75.8, K71;<br>K72; K73; K74; K75; K76; K77 |
| Personal history of malignant neoplasm of the digestive organs | CIHI | Z85.09                                                          |
| Inflammatory bowel disease                                     | CIHI | K50x; K51x; K52x                                                |
| Polyposis syndrome                                             | CIHI | D12.6; Q85.8                                                    |

**eTable 2. Detailed Description of Cardiovascular-Related Admissions**

| <b>CV diagnoses</b>           | <b>All CV-related admissions (n=274)</b> | <b>Admissions in the age group 50-74 (n=138)</b> | <b>Admissions in the age group ≥ 75 (n=136)</b> |
|-------------------------------|------------------------------------------|--------------------------------------------------|-------------------------------------------------|
| Heart failure (n, %)          | 90 (32.8)                                | 38 (27.5)                                        | 52 (39.0)                                       |
| Valvular disease (n, %)       | 9 (3.3)                                  | 3 (2.2)                                          | 6 (4.4)                                         |
| Cardiac arrhythmia (n, %)     | 29 (10.6)                                | 14 (10.1)                                        | 15 (11.0)                                       |
| Myocardial infarction (n, %)  | 54 (19.7)                                | 35 (25.4)                                        | 19 (14.0)                                       |
| Thromboembolic disease (n, %) | 50 (18.2)                                | 25 (18.1)                                        | 25 (18.3)                                       |
| Acute kidney injury (n, %)    | 22 (8.0)                                 | 14 (10.1)                                        | 8 (5.9)                                         |
| Endocarditis (n, %)           | 8 (3.0)                                  | 6 (4.4)                                          | 2 (1.5)                                         |
| Miscellanea (n, %)            | 12 (4.4)                                 | 5 (2.2)                                          | 8 (5.9)                                         |

CV: cardiovascular

**eTable 3. Matched Analysis According to Number of Comorbidities and Frequencies of Comorbidities for Older and Younger Patients**

| <b>Matched cohort</b> |                                    |                                       |
|-----------------------|------------------------------------|---------------------------------------|
|                       | <b>≥ 75 years old<br/>(N=7569)</b> | <b>&lt; 75 years old<br/>(N=7569)</b> |
| 0 comorbidities       | n=5918                             | n=5918                                |
| 1 comorbidity         | n=1209                             | n=1209                                |
| 2 comorbidities       | n=263                              | n=263                                 |
| 3 comorbidities       | n=97                               | n=97                                  |
| 4 comorbidities       | n=49                               | n=49                                  |
| 5 comorbidities       | n=22                               | n=22                                  |
| 6 comorbidities       | n=8                                | n=8                                   |
| 7 comorbidities       | n=3                                | n=3                                   |

**eTable 4. Rates of Surgically Treated Colorectal Cancer According to Type of Colonoscopy**

|                                               | <b>Index colonoscopy</b> | <b>Surveillance colonoscopy</b> | <b>P-value(*)</b> |
|-----------------------------------------------|--------------------------|---------------------------------|-------------------|
| <b>All (N= 38,069)</b>                        | 219/27,831 (0.8)         | 44/10,238 (0.4)                 | < 0.001           |
| <b>CRC-screen eligible cohort (n= 30,443)</b> | 120/22,566 (0.5)         | 24/7877 (0.3)                   | 0.01              |
| <b>Elderly cohort (n= 7,626)</b>              | 99/5265 (1.9)            | 20/2361 (0.9)                   | 0.001             |

(\*) Chi-squared test
